# Supplementary material
Source: MDPI journal article supplement (https://www.mdpi.com/2073-4360/7/7/1192)
Supplement: s1 [file s1]

## Supporting Information

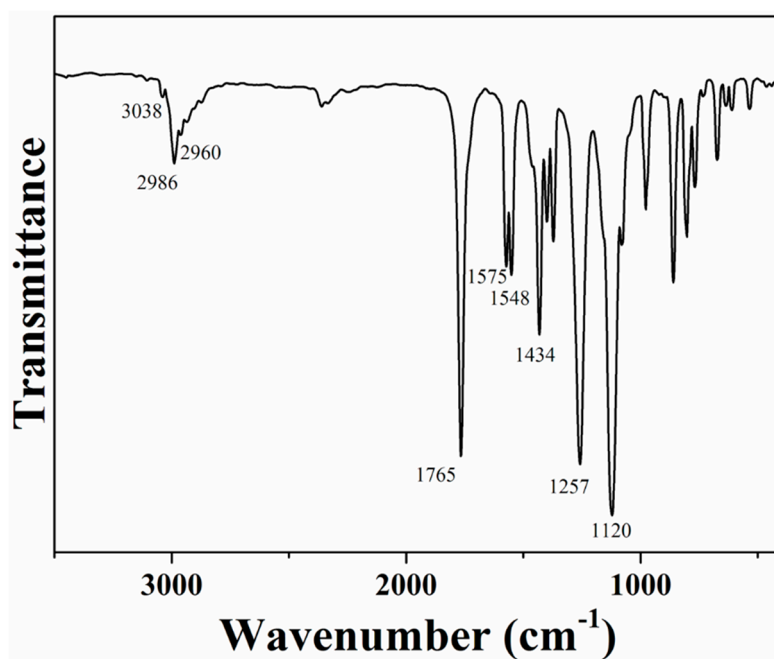

Figure S1. FT-IR spectrum of Monomer 5.

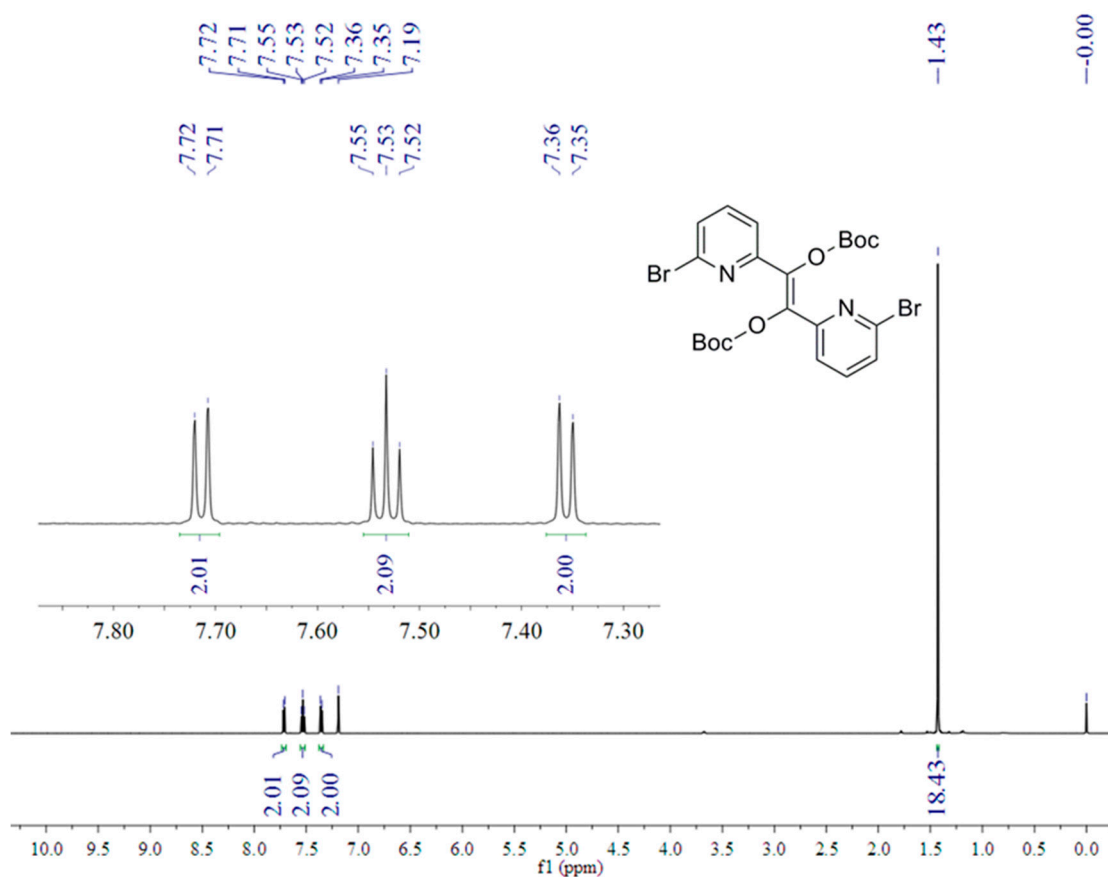

Figure S2.  $^1\text{H}$  NMR spectrum of Monomer 5.

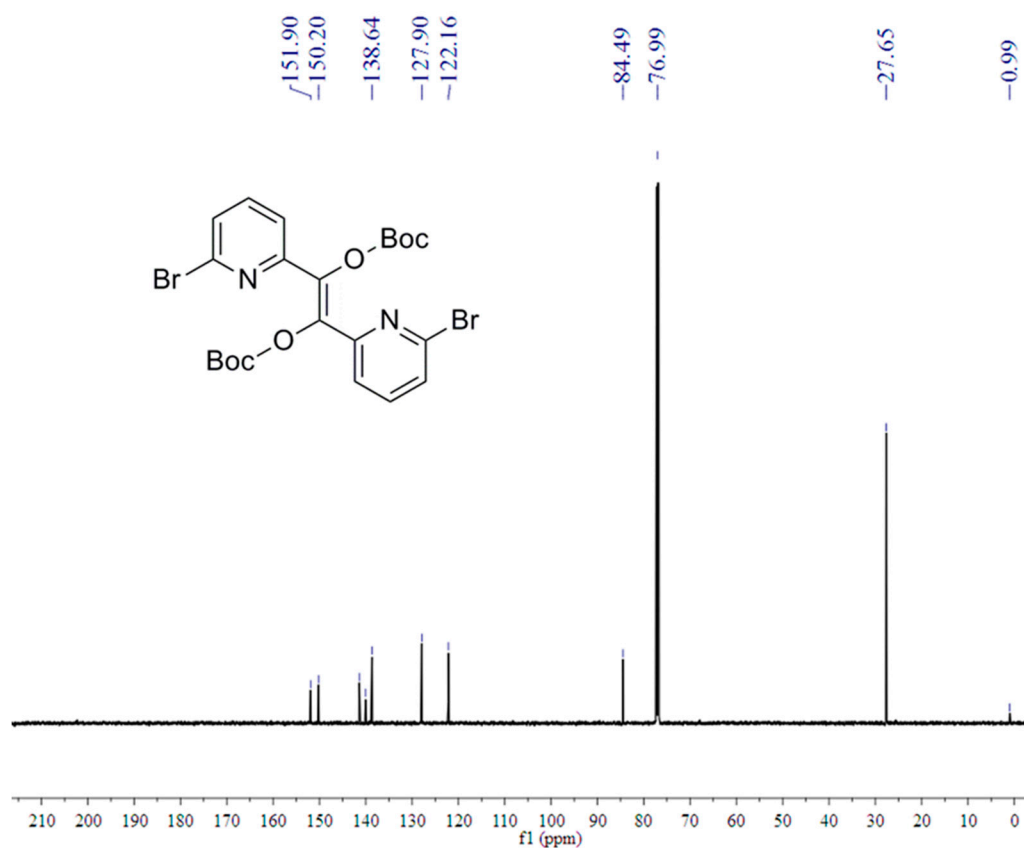

Figure S3. <sup>13</sup>C NMR spectrum of Monomer 5.

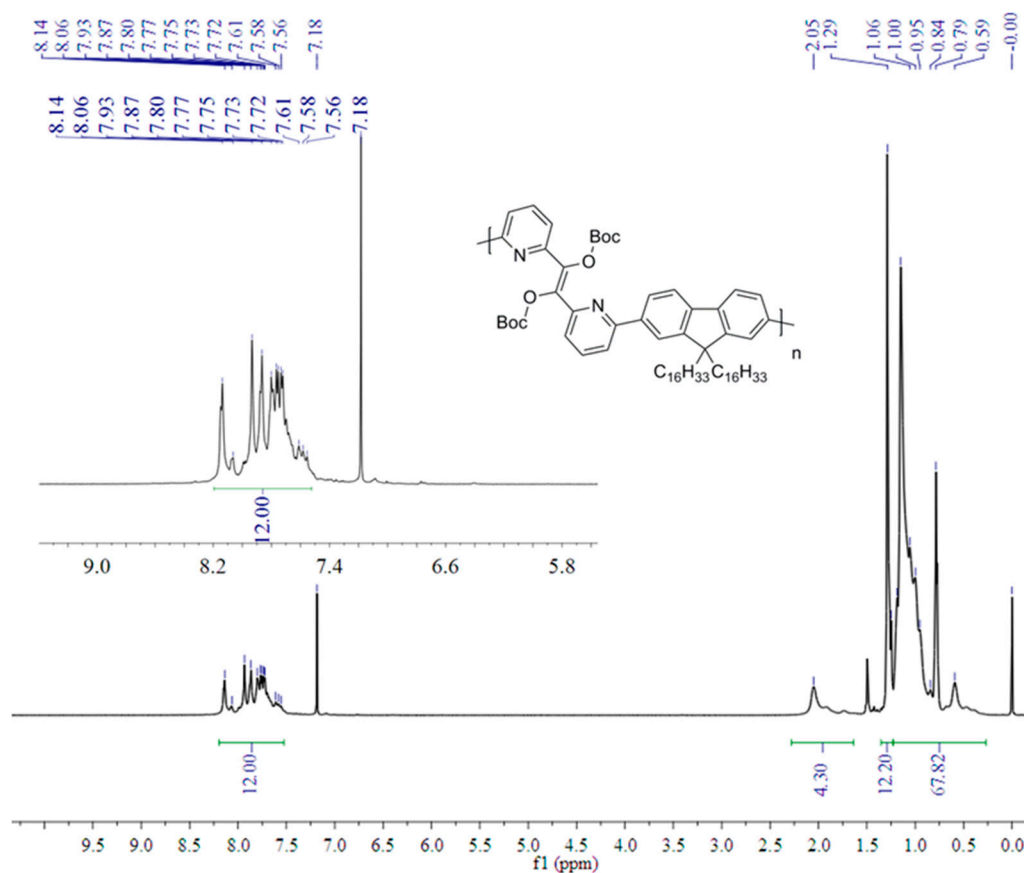

Figure S4. <sup>1</sup>H NMR spectrum of Boc-poly.

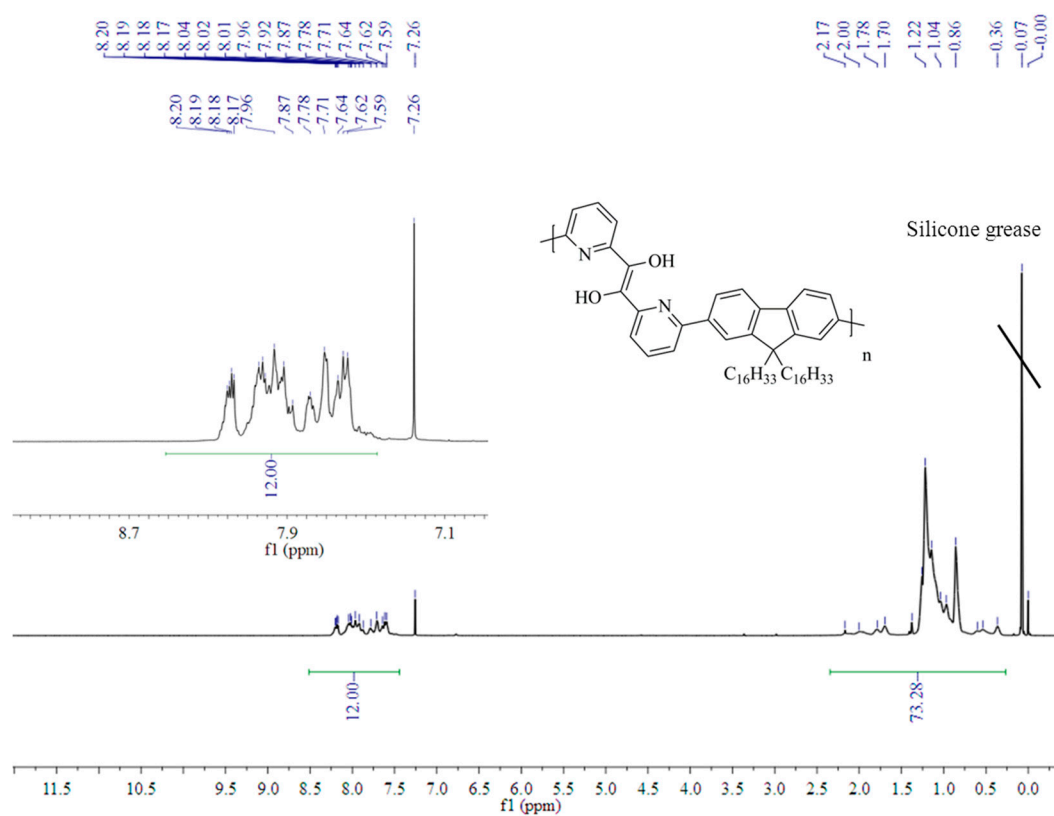Figure S5. <sup>1</sup>H NMR spectrum of poly-1.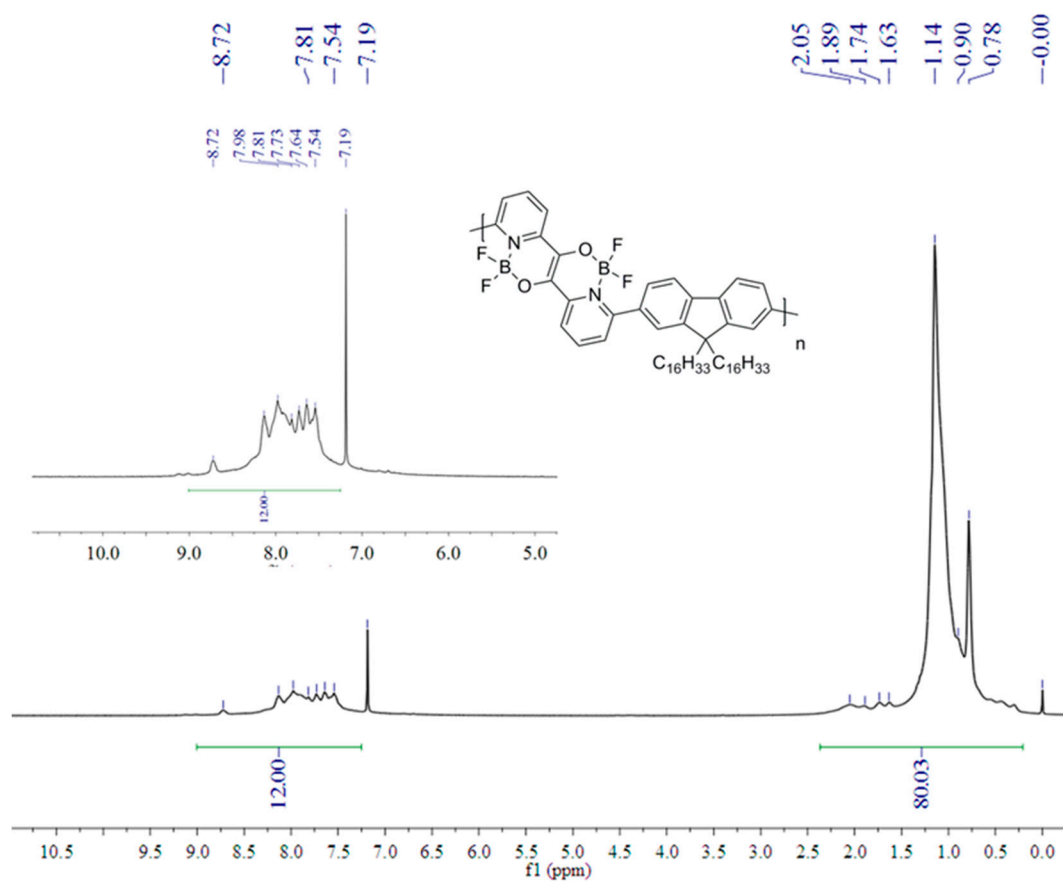Figure S6. <sup>1</sup>H NMR spectrum of BF<sub>2</sub>-poly.

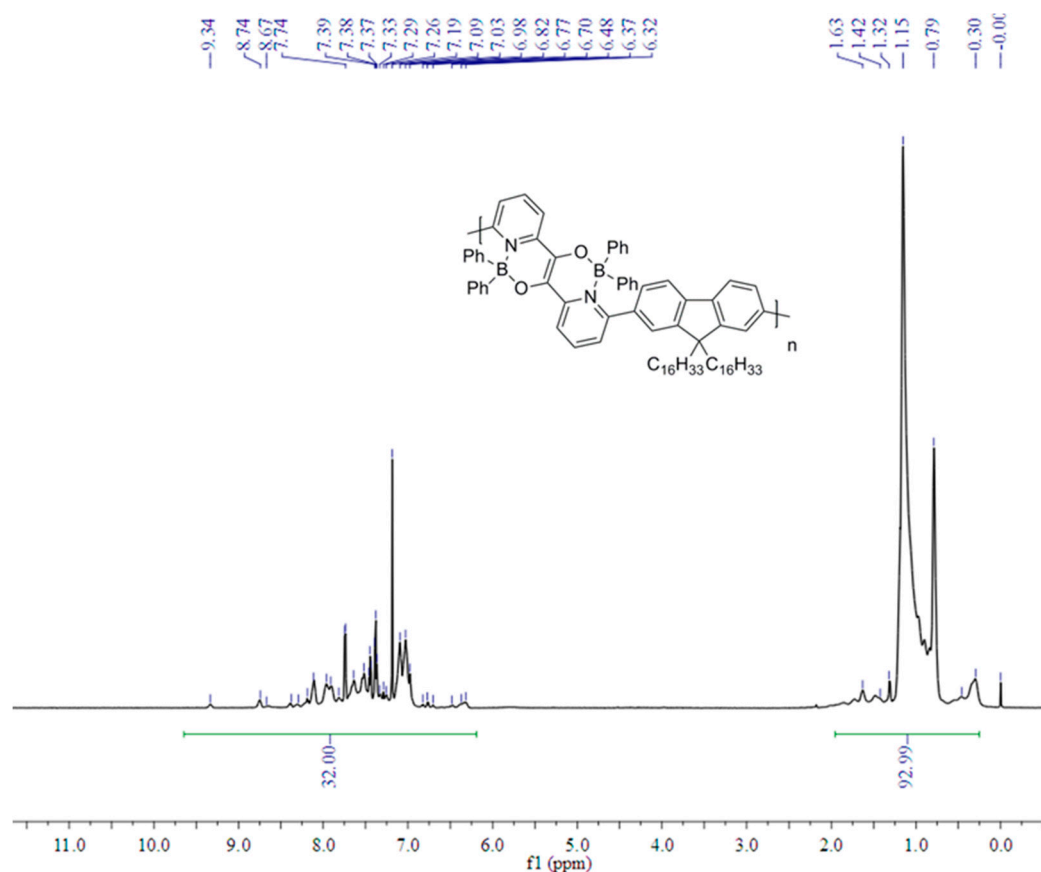Figure S7. <sup>1</sup>H NMR spectrum of BPh<sub>2</sub>-poly.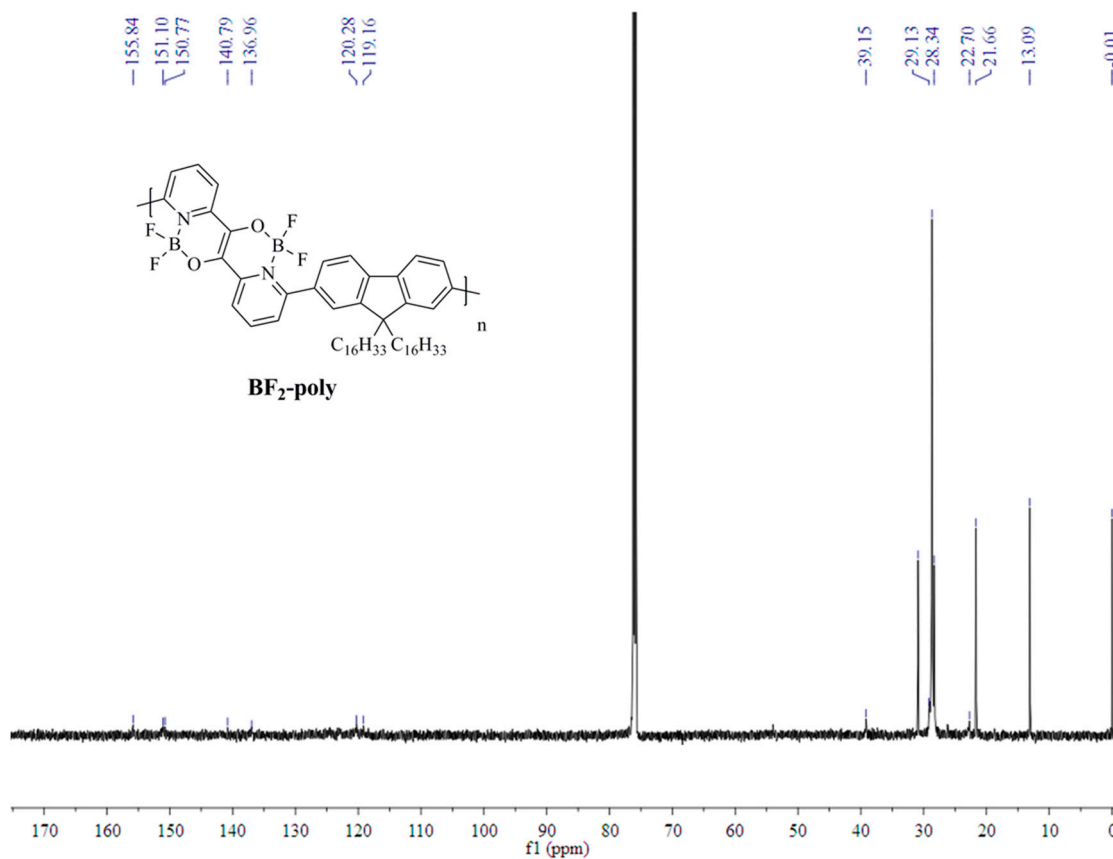Figure S8. <sup>13</sup>C NMR spectrum of BF<sub>2</sub>-poly.

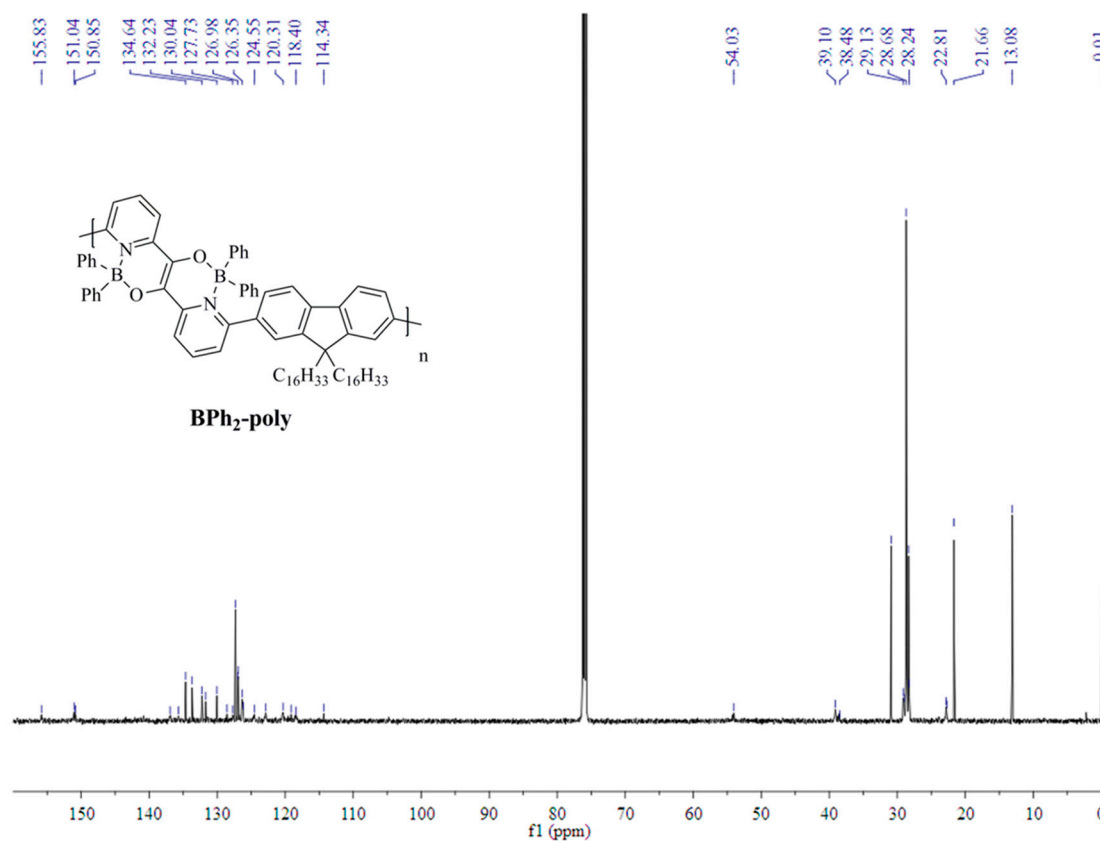

**Figure S9.** <sup>13</sup>C NMR spectrum of **BPh<sub>2</sub>-poly**.

© 2015 by the authors; licensee MDPI, Basel, Switzerland. This article is an open access article distributed under the terms and conditions of the Creative Commons Attribution license (<http://creativecommons.org/licenses/by/4.0/>).
